# Supplementary material for: Parameter estimation and identifiability in a neural population model for electro-cortical activity
Source: PubMed Central journal article supplement (PMC6542506; doi:10.1371/journal.pcbi.1006694), 2019-05-30
Supplement: pcbi.1006694.s002.pdf [file pcbi.1006694.s002.pdf]

## S2 Appendix

### Derivation of the Fisher Information Matrix

The definition of the Fisher information matrix (FIM) for a p.d.f.  $f(\mathbf{x}|\boldsymbol{\theta})$  is :

$$I_{\mu\nu}(\boldsymbol{\theta}) = \int f(\mathbf{x}|\boldsymbol{\theta}) \frac{\partial \ln f(\mathbf{x}|\boldsymbol{\theta})}{\partial \theta_\mu} \frac{\partial \ln f(\mathbf{x}|\boldsymbol{\theta})}{\partial \theta_\nu} d^N \mathbf{x} \quad (1)$$

If the components of the vector  $\mathbf{x}$  are independent then

$$f(\mathbf{x}|\boldsymbol{\theta}) = \prod_k f_k(x_k|\boldsymbol{\theta}) \quad (2)$$

For this case, taking account of the normalisation,  $\int f_k(x_k|\boldsymbol{\theta}) dx_k = 1$ , it is straightforward to show that:

$$I_{\mu\nu}(\boldsymbol{\theta}) = \sum_k I_{\mu\nu}^{(k)}(\boldsymbol{\theta}) \quad (3)$$

where

$$I_{\mu\nu}^{(k)}(\boldsymbol{\theta}) = \int f_k(x_k|\boldsymbol{\theta}) \frac{\partial \ln f_k(x_k|\boldsymbol{\theta})}{\partial \theta_\mu} \frac{\partial \ln f_k(x_k|\boldsymbol{\theta})}{\partial \theta_\nu} dx_k \quad (4)$$

is the FIM based on the marginal p.d.f. for the component  $x_k$ .

For the problem in which the components of the vector  $\mathbf{x}$  are model spectral estimates at different frequencies evaluated using the Welch periodogram, and providing that the correlations introduced by the overlap and non-uniform shapes of the windows used can be neglected, the spectral estimate at a given frequency has a gamma distribution of the form:

$$f_k(x_k; K, \Theta_k) = \frac{x_k^{K-1} e^{-\frac{x_k}{\Theta_k}}}{\Theta_k^K \Gamma(K)}; x_k \geq 0 \quad (5)$$

where  $K$  is the number of segments averaged in the Welch periodogram (which is independent of the system parameters,  $\boldsymbol{\theta}$ ) and the scale parameter,  $\Theta_k$ , (which does depend on the system parameters) is related to the model's expected power spectral density at the given frequency by

$$\Theta_k = \frac{\alpha |T(i\omega_k|\boldsymbol{\theta})|^2}{K} \quad (6)$$

In this equation,  $T(s|\boldsymbol{\theta})$  is the linearized model transfer function,  $\omega_k$  is the  $k^{th}$  sampled frequency and  $\alpha$  is the power matching parameter introduced in the main article. For our immediate purpose, investigating the sensitivity of the model output to changes in the system parameters, we can treat  $\alpha$  as a given constant. With these distributions the integrals in the definition of the Fisher information matrix can be explicitly performed and the expression for  $I_{\mu\nu}^{(k)}(\boldsymbol{\theta})$  considerably simplified. Thus (dropping the  $k$  subscripts for convenience):

$$\ln f(x; K, \Theta) = (K-1) \ln x - \frac{x}{\Theta} - K \ln \Theta - \ln \Gamma(K) \quad (7)$$

so

$$\frac{\partial}{\partial \theta_\mu} \ln f(x; K, \Theta) = (x - K\Theta) \frac{1}{\Theta^2} \frac{\partial \Theta}{\partial \theta_\mu} \quad (8)$$

Then, substituting for the derivatives and moving terms independent of  $x$  outside the integral, we get

$$I_{\mu\nu}(\boldsymbol{\theta}) = \frac{1}{\Theta^4} \frac{\partial\Theta}{\partial\theta_\mu} \frac{\partial\Theta}{\partial\theta_\nu} \int f(x; K, \Theta)(x - K\Theta)^2 dx \quad (9)$$

The mean of the gamma distribution is  $K\Theta$  so the integral in the equation is equal to the variance of the gamma distribution, which is equal to  $K\Theta^2$ , thus:

$$\begin{aligned} I_{\mu\nu}(\boldsymbol{\theta}) &= \frac{1}{\Theta^4} \frac{\partial\Theta}{\partial\theta_\mu} \frac{\partial\Theta}{\partial\theta_\nu} \text{var}(X) \\ &= \frac{K}{\Theta^2} \frac{\partial\Theta}{\partial\theta_\mu} \frac{\partial\Theta}{\partial\theta_\nu} \\ &= K \frac{\partial \ln \Theta}{\partial\theta_\mu} \frac{\partial \ln \Theta}{\partial\theta_\nu} \\ &= K \frac{\partial \ln |T(i\omega|\boldsymbol{\theta})|^2}{\partial\theta_\mu} \frac{\partial \ln |T(i\omega|\boldsymbol{\theta})|^2}{\partial\theta_\nu} \end{aligned} \quad (10)$$

Thus, restoring the  $k$  subscripts and defining the sampled values of the model power spectral density,  $\hat{S}_k \equiv |T(i\omega_k|\boldsymbol{\theta})|^2$ , we get

$$I_{\mu\nu}(\boldsymbol{\theta}) = K \sum_k \frac{\partial \ln \hat{S}_k}{\partial\theta_\mu} \frac{\partial \ln \hat{S}_k}{\partial\theta_\nu} \quad (11)$$

Since, in the region of interest, the transfer function for the linearized model appears to have no zeros on the imaginary axis, it follows that  $\hat{S}_k > 0$  and this form provides a useful simplification of the FIM.
