# Supplementary material for: Parameter estimation and identifiability in a neural population model for electro-cortical activity
Source: PubMed Central journal article supplement (PMC6542506; doi:10.1371/journal.pcbi.1006694), 2019-05-30
Supplement: pcbi.1006694.s005.pdf [file pcbi.1006694.s005.pdf]

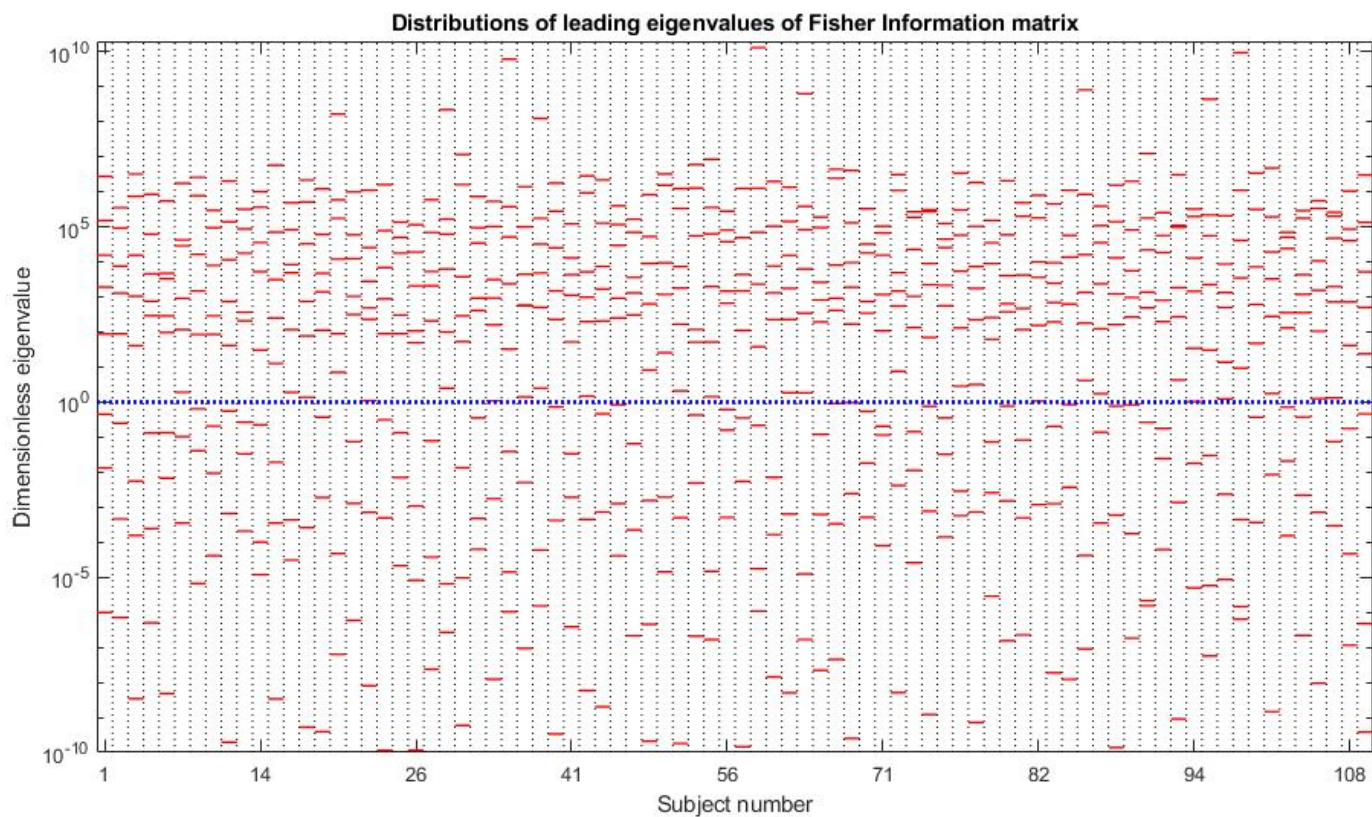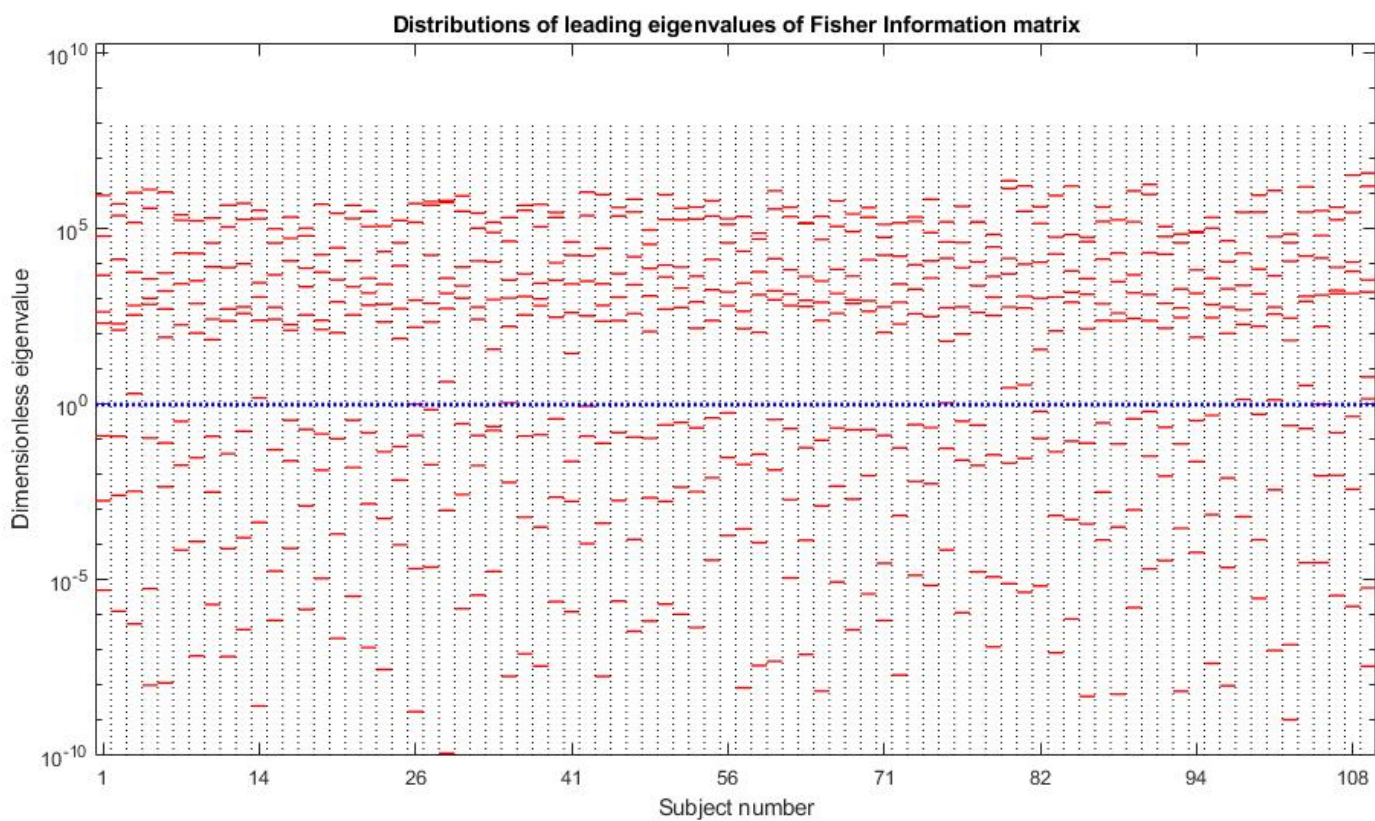

**S2 Fig. FIM eigenspectra for all subjects.** The spectra of the Fisher information matrices have been plotted here for all 82 subjects; the top plot using LS parameters and the bottom plot using the ML parameters. The similarity of the character of the spectra across most subjects is apparent.
