# Supplementary material for: Parameter estimation and identifiability in a neural population model for electro-cortical activity
Source: PubMed Central journal article supplement (PMC6542506; doi:10.1371/journal.pcbi.1006694), 2019-05-30
Supplement: pcbi.1006694.s006.pdf [file pcbi.1006694.s006.pdf]

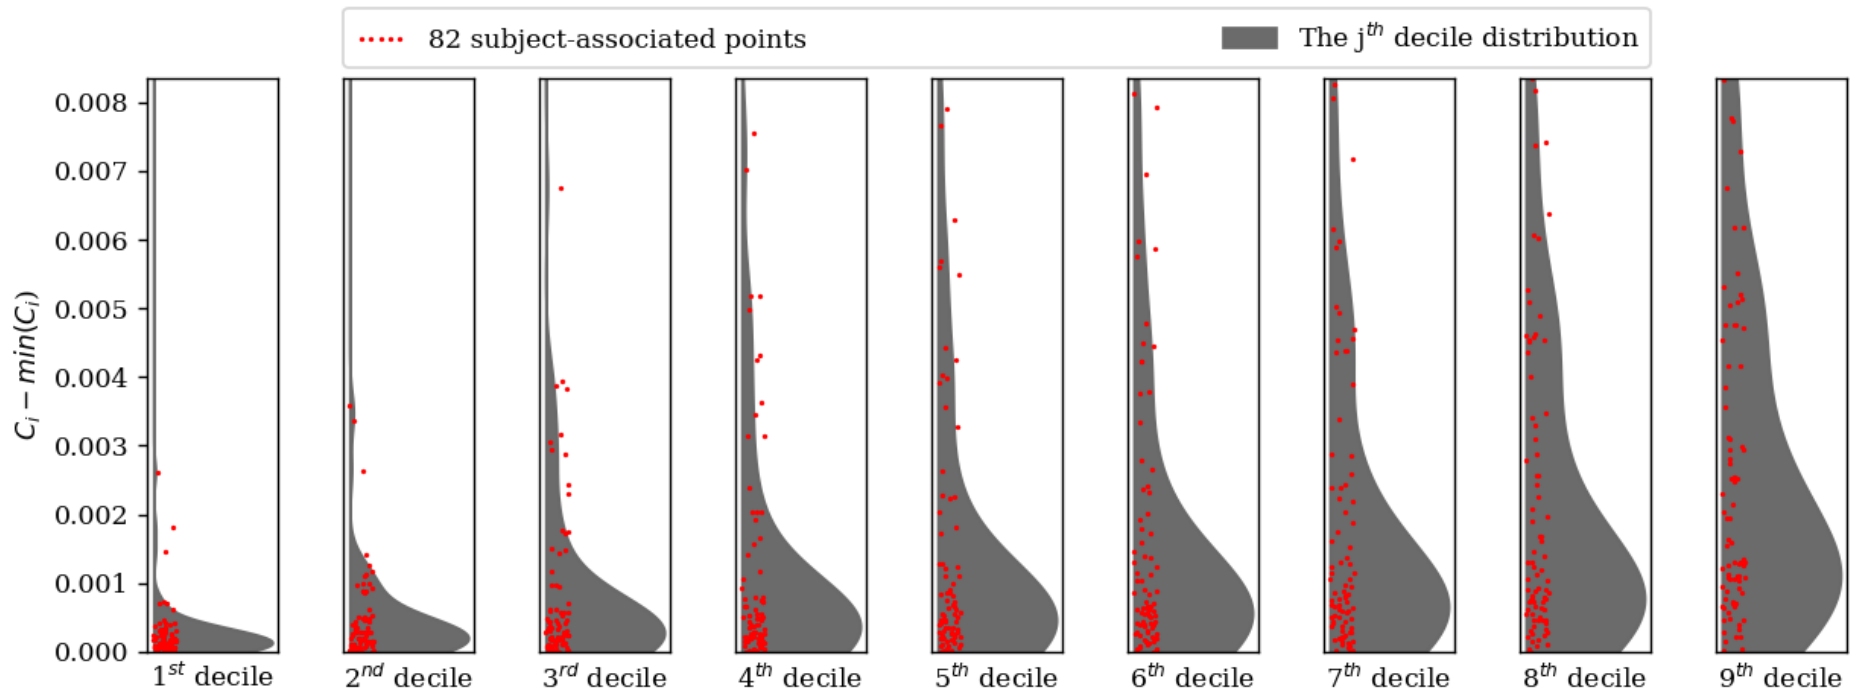

**S3 Fig. Distribution of cost functions found by particle swarm optimization (PSO).** In the PSO approach, the spectrum from each subject,  $i$  (where  $i = 1 \dots 82$ ), is independently fit 1000 times, giving 1000 different parameter estimates (where each estimate is a 22-dimensional vector). However, several of these estimates are far from the global optimum and give visually poor fits. To decide on an objective criterion for which fits to keep, we examined the distribution of cost functions  $C_{ij}$  for each of the 1000 different estimates ( $j$ ) in each of the 82 subjects ( $i$ ). The ‘relative cost’,  $C_{ij} - \min(C_i)$  is the difference between the cost from a given sample and the minimum cost for that subject and is a measure of relative fit quality. On the leftmost plot, the relative cost of the estimate with the 100<sup>th</sup> lowest cost function (the 1<sup>st</sup> decile) is shown for each of the 82 subjects (red dots). The next plot shows the relative cost of the estimate with the 200<sup>th</sup> smallest cost function (the 2<sup>nd</sup> decile), and so on. These decile plots highlight the presence of outliers (‘bad fits’) which become more extreme and more frequent as a greater proportion of the estimates are included away from the global optimum. By selecting only those fits in the first decile—the top 10% of fits to each subject’s spectrum, in other words, the 100 best fits—we minimize the influence of outliers while still preserving a sufficient number of samples to characterize the shape of the cost function near the global optimum.
